# Supplementary material for: Aroclor1254 disrupts the blood–testis barrier by promoting endocytosis and degradation of junction proteins via p38 MAPK pathway
Source: PubMed Central journal article supplement (PMC5520738; doi:10.1038/cddis.2017.224), 2017-05-25

Fig.S3 (Jia XY, et al)

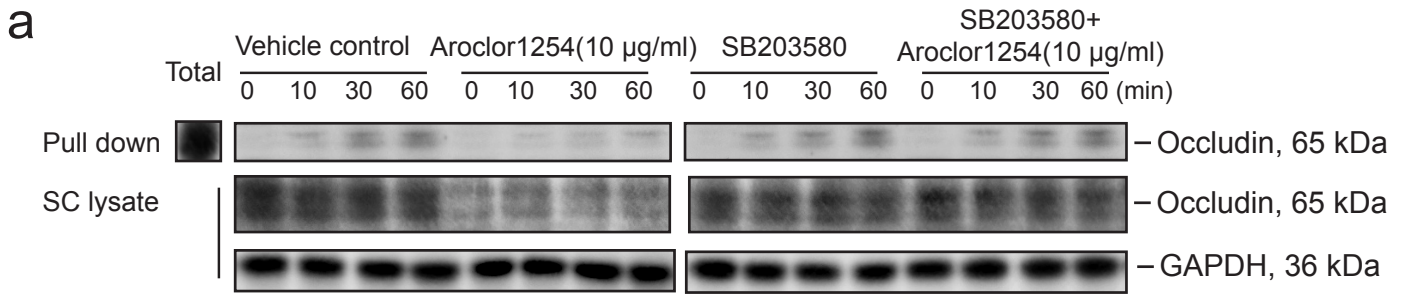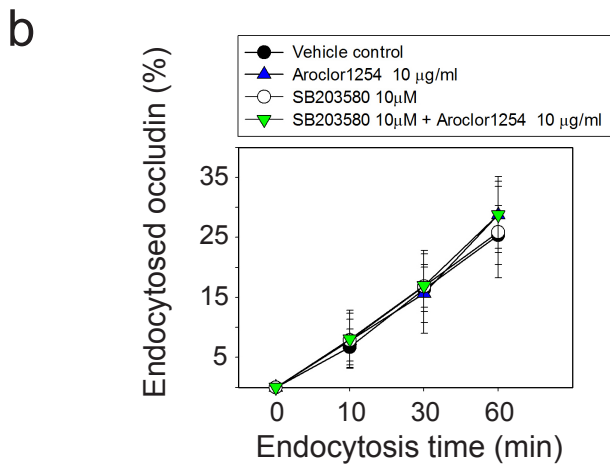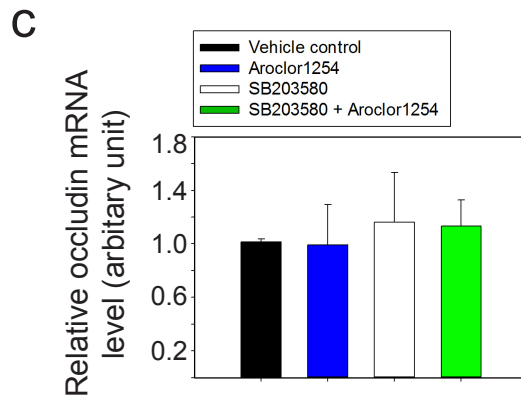

Supplement: cddis2017224x4.pdf [file cddis2017224x4.pdf]
